# Supplementary material
Source: publisher figshare collection journal article supplement (https://acs.figshare.com/ndownloader/files/22296195)
Supplement: Supplementary file 1 [file 22296195]

Supplementary Information S1: Sample QC for RNA-seq of sorted cells from WHV+ Woodchuck Experiment 3

|                                   |                  |                  |                  |                  |
|-----------------------------------|------------------|------------------|------------------|------------------|
|                                   | CD14+ NP-        | CD14- NP-        | CD14- NP+        | CD14+ NP+        |
| Total fragments sequenced :       | 36693444         | 27633516         | 26666663         | 32705550         |
| Successfully assigned fragments : | 20743633 (56.5%) | 17433846 (63.1%) | 17477941 (65.5%) | 20057980 (61.3%) |

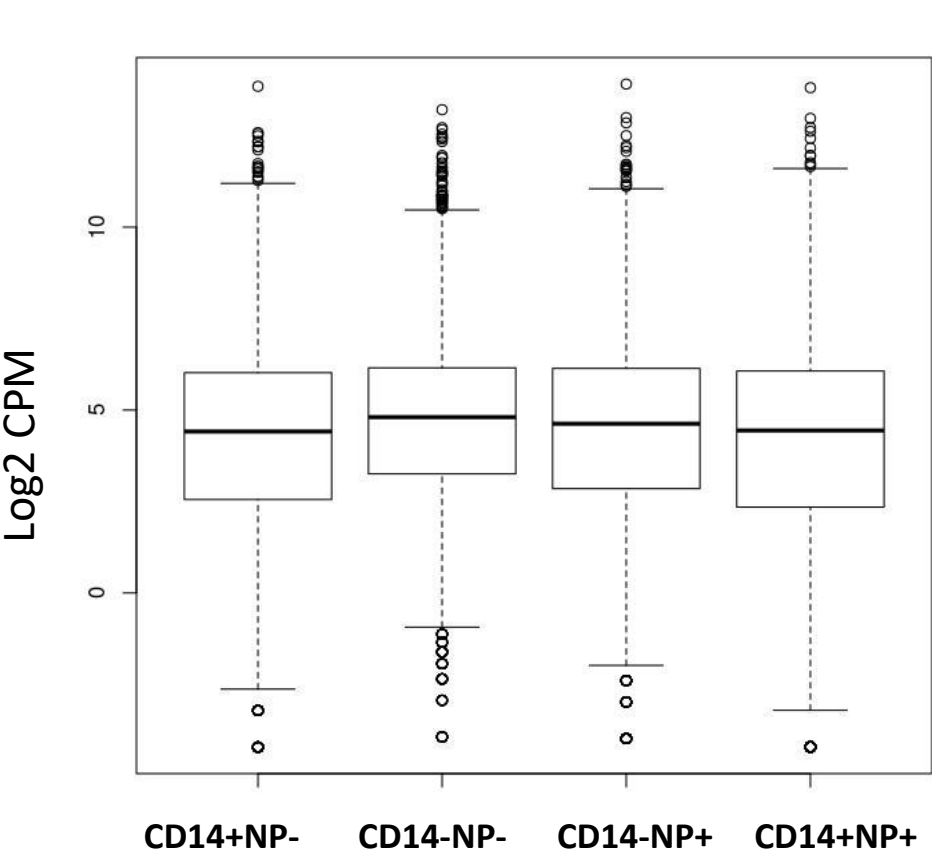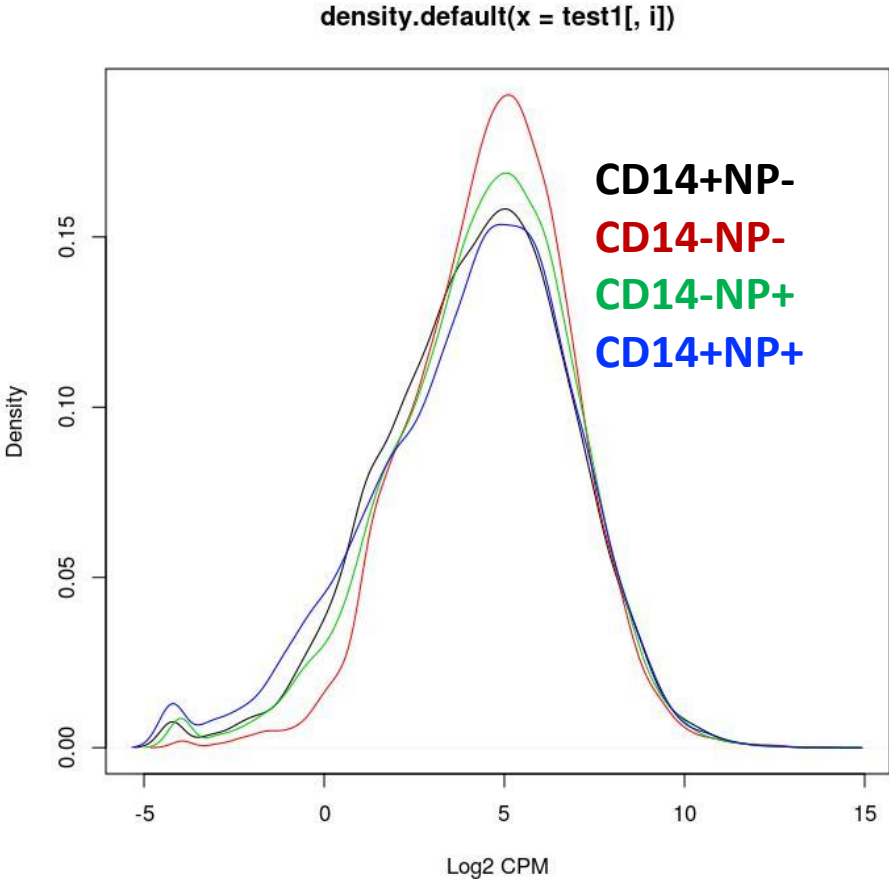

The data was first normalized by counts-per-million (cpm) and then subjected to TMM (trimmed mean of M). TMM removes low count genes by cpm-cutoff to filter out noise. The values for cpm-cutoff were determined empirically for the minimum value required to achieve the best normalization among the samples (obtain a normal distribution among the samples). Furthermore, any genes with duplicated symbols are removed due to potential errors in the reference genome assembly. For this study, only protein-coding genes were used and the best cpm-cutoff is determined to be 2 and this value is examined by boxplots and density curves that shows a near-normal distribution.
